# Supplementary material for: Bacterial Adaptation through Loss of Function
Source: PubMed Central journal article supplement (PMC3708842; doi:10.1371/journal.pgen.1003617), 2013-07-11

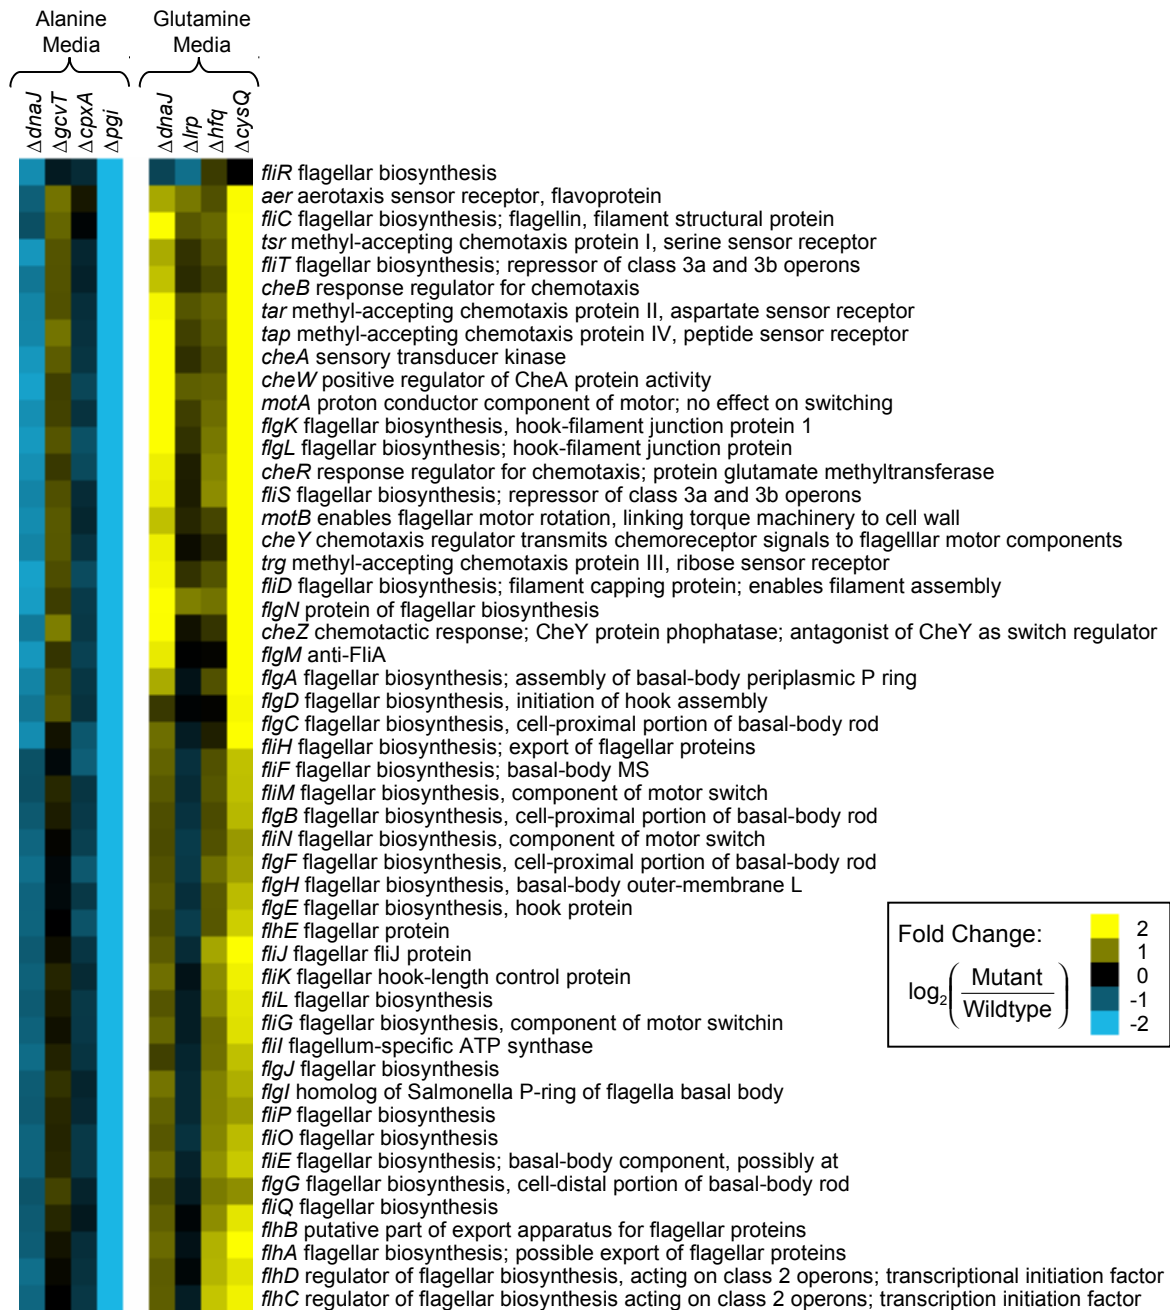

Supplement: pgen.1003617.s005.pdf [file pgen.1003617.s005.pdf]
